# Supplementary material
Source: Elsevier journal article supplement (https://www.sciencedirect.com/science/article/pii/S0300893224003257)
Supplement: mmc1 [file mmc1.pdf]

He J, et al. J-shaped association between apolipoprotein B and CV outcomes in statin-treated patients with chronic coronary syndrome. *Rev Esp Cardiol.* 2024

## SUPPLEMENTARY DATA

**Table 1 of the supplementary data.** Correlation between apoB and clinical CV risk factors

| Variables                        | Correlation coefficient | P      |
|----------------------------------|-------------------------|--------|
|                                  |                         |        |
| Age, y                           | −0.070                  | < .001 |
| BMI, kg/m <sup>2</sup>           | 0.064                   | < .001 |
| SBP, mmHg                        | 0.088                   | < .001 |
| DBP, mmHg                        | 0.099                   | < .001 |
| LVEF, %                          | 0.023                   | .035   |
| Apo A1, g/L                      | 0.115                   | < .001 |
| TC, mmol/L                       | 0.891                   | < .001 |
| TG, mmol/L                       | 0.290                   | < .001 |
| LDL-C, mmol/L                    | 0.901                   | < .001 |
| HDL-C, mmol/L                    | 0.030                   | .005   |
| Non-HDL-C, mmol/L                | 0.917                   | < .001 |
| hsCRP, mg/L                      | 0.133                   | < .001 |
| FPG, mmol/L                      | 0.069                   | < .001 |
| HbA1c, %                         | 0.072                   | < .001 |
| Serum creatinine, μmol/L         | −0.001                  | .892   |
| eGFR, mL/min/1.73 m <sup>2</sup> | −0.028                  | .010   |
| Lp(a), mg/dL                     | 0.147                   | < .001 |

apoA1, apolipoprotein A1; apoB, apolipoprotein B; BMI, body mass index; CV, cardiovascular; DBP; diastolic blood pressure; eGFR, estimated glomerular filtration rate; FPG, fasting plasma glucose; HbA1c, hemoglobin A1c; HDL-C, high-density lipoprotein cholesterol; hsCRP, high sensitivity C-reactive protein;

He J, et al. *J-shaped association between apolipoprotein B and CV outcomes in statin-treated patients with chronic coronary syndrome. Rev Esp Cardiol. 2024*

LDL-C, low-density lipoprotein cholesterol; Lp(a), lipoprotein(a); LVEF, left ventricular ejection fraction;

SBP, systolic blood pressure; TC, total cholesterol; TG, triglycerides.

He J, et al. J-shaped association between apolipoprotein B and CV outcomes in statin-treated patients with chronic coronary syndrome. Rev Esp Cardiol. 2024

Table 2 of the supplementary data. Rates of 3-year CV outcomes stratified by apoB quintiles

| Endpoints              | Q1       | Q2       | Q3       | Q4       | Q5       | P    |
|------------------------|----------|----------|----------|----------|----------|------|
|                        |          |          |          |          |          |      |
| CV events <sup>a</sup> | 64 (3.7) | 51 (2.7) | 30 (1.9) | 35 (2.1) | 52 (3.0) | .007 |
| MACE <sup>b</sup>      | 55 (3.2) | 48 (2.6) | 24 (1.5) | 25 (1.5) | 45 (2.6) | .002 |
| All-cause death        | 42 (2.4) | 40 (2.1) | 18 (1.1) | 32 (1.9) | 29 (1.7) | .065 |
| CV death               | 30 (1.7) | 28 (1.5) | 10 (0.6) | 13 (0.8) | 24 (1.4) | .011 |

CV, cardiovascular; MACE, major adverse cardiovascular event; MI, myocardial infarction.

Values are presented as No. (%).

<sup>a</sup>CV events were defined as a composite of CV death, nonfatal MI, and nonfatal stroke.

<sup>b</sup>MACE was defined as a composite of CV death and nonfatal MI.

He J, et al. J-shaped association between apolipoprotein B and CV outcomes in statin-treated patients with chronic coronary syndrome. *Rev Esp Cardiol.* 2024

**Table 3 of the supplementary data.** Variable assignments for Cox LASSO regression models and risk

factors selected by Cox LASSO regression model

| Variables       | Risk factors            | Assignment          | Coefficients <sup>a</sup> for selected factors |                   |          |
|-----------------|-------------------------|---------------------|------------------------------------------------|-------------------|----------|
|                 |                         |                     | CV events <sup>b</sup>                         | MACE <sup>c</sup> | CV death |
| X <sub>1</sub>  | Age                     | Continuous variable | 0.0503                                         | 0.0536            | 0.0653   |
| X <sub>2</sub>  | Male                    | Yes = 1, no = 0     |                                                |                   |          |
| X <sub>3</sub>  | BMI                     | Continuous variable | -0.0052                                        | -0.0047           | -0.0561  |
| X <sub>4</sub>  | Family history of CAD   | Yes = 1, no = 0     |                                                |                   |          |
| X <sub>5</sub>  | Previous MI             | Yes = 1, no = 0     | 0.0391                                         | 0.0986            |          |
| X <sub>6</sub>  | Prior revascularization | Yes = 1, no = 0     | 0.1845                                         | 0.2351            |          |
| X <sub>7</sub>  | Hypertension            | Yes = 1, no = 0     |                                                |                   |          |
| X <sub>8</sub>  | SBP                     | Continuous variable |                                                |                   |          |
| X <sub>9</sub>  | DBP                     | Continuous variable |                                                |                   | -0.0022  |
| X <sub>10</sub> | Diabetes                | Yes = 1, no = 0     |                                                |                   |          |
| X <sub>11</sub> | Previous stroke         | Yes = 1, no = 0     |                                                |                   | 0.0841   |
| X <sub>12</sub> | Current smoker          | Yes = 1, no = 0     |                                                | -0.0980           |          |
| X <sub>13</sub> | PAD                     | Yes = 1, no = 0     | 0.2850                                         | 0.4094            | 0.3617   |
| X <sub>14</sub> | LVEF                    | Continuous variable | -0.0235                                        | -0.0258           | -0.0385  |
| X <sub>15</sub> | apoB                    | Continuous variable |                                                |                   |          |
| X <sub>16</sub> | apoA1                   | Continuous variable | -0.1742                                        | -0.2637           | -0.4836  |
| X <sub>17</sub> | Lp(a)                   | Continuous variable |                                                |                   |          |
| X <sub>18</sub> | TG                      | Continuous variable | -0.0040                                        | -0.0678           |          |
| X <sub>19</sub> | HDL-C                   | Continuous variable |                                                |                   |          |
| X <sub>20</sub> | hsCRP                   | Continuous variable |                                                | 0.0024            |          |
| X <sub>21</sub> | FPG                     | Continuous variable |                                                |                   |          |
| X <sub>22</sub> | HbA1c                   | Continuous variable | 0.0975                                         | 0.1265            |          |
| X <sub>23</sub> | Creatinine              | Continuous variable | 0.0037                                         | 0.0036            | 0.0077   |
| X <sub>24</sub> | eGFR                    | Continuous variable |                                                |                   |          |
| X <sub>25</sub> | SYNTAX score            | Continuous variable |                                                |                   |          |
| X <sub>26</sub> | Left main disease       | Yes = 1, no = 0     |                                                | 0.0843            |          |

He J, et al. J-shaped association between apolipoprotein B and CV outcomes in statin-treated patients with chronic coronary syndrome. *Rev Esp Cardiol.* 2024

|                 |                      |                 |        |        |        |
|-----------------|----------------------|-----------------|--------|--------|--------|
| X <sub>27</sub> | Three-vessel disease | Yes = 1, no = 0 |        |        |        |
| X <sub>28</sub> | Type B2/C lesion     | Yes = 1, no = 0 |        |        |        |
| X <sub>29</sub> | CTO lesion           | Yes = 1, no = 0 |        |        | 0.2003 |
| X <sub>30</sub> | Ostial lesion        | Yes = 1, no = 0 |        |        |        |
| X <sub>31</sub> | Nitrates             | Yes = 1, no = 0 | 0.0507 | 0.3407 |        |
| X <sub>32</sub> | Beta-blocker         | Yes = 1, no = 0 |        |        |        |
| X <sub>33</sub> | ACEI/ARB             | Yes = 1, no = 0 |        |        |        |
| X <sub>34</sub> | Clopidogrel          | Yes = 1, no = 0 | 0.1712 | 0.2125 | 0.5684 |
| X <sub>35</sub> | Aspirin              | Yes = 1, no = 0 |        |        |        |

ACEI, angiotensin-converting enzyme inhibitor; apoA1, apolipoprotein A1; apoB, apolipoprotein B; ARB, angiotensin II receptor blocker; BMI, body mass index; CAD, coronary artery disease; CV, cardiovascular; DBP, diastolic blood pressure; CTO, chronic total occlusion; eGFR, estimated glomerular filtration rate; FPG, fasting plasma glucose; HbA1c, hemoglobin A1c; HDL-C, high-density lipoprotein cholesterol; hsCRP, high sensitivity C-reactive protein; LASSO, least absolute shrinkage and selection operator; Lp(a), lipoprotein(a); LDL-C, low-density lipoprotein cholesterol; LVEF, left ventricular ejection fraction; MI, myocardial infarction; PAD, peripheral artery disease; SBP, systolic blood pressure; TC, total cholesterol; SYNTAX, synergy between PCI with taxus and cardiac surgery; TG, triglycerides.

<sup>a</sup> The “Coefficients” refers to the regression coefficients obtained from the Cox regression model. To facilitate interpretation, it is important to note that the hazard ratio (HR) can be derived from these coefficients by using the transformation  $\exp(\text{Coefficient}) = \text{HR}$ . This means that a positive coefficient indicates an increased hazard ( $\text{HR} > 1$ ), while a negative coefficient indicates a decreased hazard ( $\text{HR} < 1$ ).

<sup>b</sup> CV events were defined as a composite of CV death, nonfatal MI, and nonfatal stroke.

<sup>c</sup> MACEs were defined as a composite of CV death, and nonfatal MI.

He J, et al. J-shaped association between apolipoprotein B and CV outcomes in statin-treated patients with chronic coronary syndrome. Rev Esp Cardiol. 2024

**Table 4 of the supplementary data.** Multivariable Cox proportional adjusted variables selected from the LASSO regression

| Endpoints <sup>a</sup> | Quintile 1       |      | Quintile 2       |      | Quintile 3 |    | Quintile 4       |      | Quintile 5       |      | P for trend |
|------------------------|------------------|------|------------------|------|------------|----|------------------|------|------------------|------|-------------|
|                        | HR (95%CI)       | P    | HR (95%CI)       | P    | HR (95%CI) | P  | HR (95%CI)       | P    | HR (95%CI)       | P    |             |
| CV events <sup>b</sup> | 1.77 (1.14-2.75) | .011 | 1.41 (0.90-2.22) | .135 | Reference  | NA | 1.17 (0.72-1.90) | .534 | 1.84 (1.16-2.90) | .009 | .700        |
| MACEs <sup>c</sup>     | 1.84 (1.13-3.01) | .015 | 1.66 (1.01-2.71) | .045 | Reference  | NA | 1.06 (0.61-1.87) | .828 | 2.05 (1.24-3.39) | .005 | .608        |
| CV death               | 2.21 (1.07-4.55) | .032 | 2.27 (1.10-4.69) | .026 | Reference  | NA | 1.26 (0.55-2.88) | .585 | 2.51 (1.20-5.27) | .015 | .602        |

apoB, apolipoprotein B; CV, cardiovascular; LASSO, least absolute shrinkage and selection operator; MACE, major adverse cardiac events.

<sup>a</sup>HRs with 95% CIs were estimated by Cox proportional hazard models

<sup>b</sup>CV events were defined as a composite of CV death, nonfatal MI, and nonfatal stroke.

<sup>c</sup>MACEs were defined as a composite of CV death, and nonfatal MI.

He J, et al. J-shaped association between apolipoprotein B and CV outcomes in statin-treated patients with chronic coronary syndrome. Rev Esp Cardiol. 2024

**Table 5 of the supplementary data.** Cox regression analysis for apoB residual<sup>a</sup> and clinical outcomes

| Endpoints <sup>b</sup>       | Quintile 1       |          | Quintile 2       |          | Quintile 3 |          | Quintile 4       |          | Quintile 5       |          |
|------------------------------|------------------|----------|------------------|----------|------------|----------|------------------|----------|------------------|----------|
|                              | HR (95%CI)       | <i>P</i> | HR (95%CI)       | <i>P</i> | HR (95%CI) | <i>P</i> | HR (95%CI)       | <i>P</i> | HR (95%CI)       | <i>P</i> |
| <i>CV events<sup>c</sup></i> |                  |          |                  |          |            |          |                  |          |                  |          |
| Model 1 <sup>d</sup>         | 1.73 (1.13-2.64) | .011     | 1.39 (0.90-2.17) | .142     | Reference  | NA       | 1.26 (0.80-2.00) | .323     | 1.70 (1.09-2.65) | .018     |
| Model 2 <sup>e</sup>         | 1.71 (1.11-2.62) | .015     | 1.38 (0.88-2.15) | .159     | Reference  | NA       | 1.22 (0.77-1.93) | .408     | 1.77 (1.11-2.84) | .017     |
| <i>MACEs<sup>f</sup></i>     |                  |          |                  |          |            |          |                  |          |                  |          |
| Model 1                      | 1.94 (1.22-3.10) | .005     | 1.54 (0.95-2.52) | .082     | Reference  | NA       | 1.45 (0.87-2.40) | .151     | 1.69 (1.02-2.78) | .040     |
| Model 2                      | 1.89 (1.17-3.04) | .009     | 1.52 (0.93-2.49) | .093     | Reference  | NA       | 1.40 (0.84-2.32) | .197     | 1.82 (1.07-3.09) | .027     |
| <i>CV death</i>              |                  |          |                  |          |            |          |                  |          |                  |          |
| Model 1                      | 1.35 (0.74-2.44) | .326     | 1.28 (0.70-2.35) | .423     | Reference  | NA       | 0.82 (0.41-1.65) | .577     | 1.34 (0.71-2.53) | .374     |
| Model 2                      | 1.23 (0.67-2.27) | .499     | 1.29 (0.70-2.37) | .419     | Reference  | NA       | 0.76 (0.38-1.53) | .440     | 1.32 (0.67-2.63) | .424     |

95%CI, 95% confidence interval; apoB, apolipoprotein B; ACEI, angiotensin-converting enzyme inhibitor; ARB, angiotensin II receptor blocker; BMI, body mass index; CTO, chronic total occlusion; CV, cardiovascular; eGFR, estimated glomerular filtration rate; HDL-C, high-density lipoprotein cholesterol; HR, hazard ratio; hsCRP, high sensitivity C-reactive protein; LDL-C, low-density lipoprotein cholesterol; Lp(a), lipoprotein(a); LVEF, left ventricular ejection fraction; MACE, major adverse cardiac events; MI, myocardial infarction; PAD, peripheral artery disease; TG, triglycerides.

<sup>a</sup>The residual of apoB was constructed after regressing apoB on LDL-C.

<sup>b</sup>HRs with 95% CIs were estimated by Cox proportional hazard models

<sup>c</sup>CV events were defined as a composite of CV death, nonfatal MI, and nonfatal stroke.

<sup>d</sup>Model 1 adjusted for age and male sex.

He J, et al. *J-shaped association between apolipoprotein B and CV outcomes in statin-treated patients with chronic coronary syndrome. Rev Esp Cardiol. 2024*

<sup>e</sup>Model 2 adjusted for Model 1, BMI, previous MI, previous revascularization, hypertension, diabetes, previous stroke, current smoking, PAD, LVEF, TG, HDL-C, hsCRP, eGFR, Lp(a), 3-vessel disease, CTO lesions, aspirin use, clopidogrel use, and ACEI/ARB use.

<sup>f</sup>MACEs were defined as a composite of CV death, and nonfatal MI.

He J, et al. J-shaped association between apolipoprotein B and CV outcomes in statin-treated patients with chronic coronary syndrome. Rev Esp Cardiol. 2024

**Table 6 of the supplementary data.** Competing risk analysis considering risks of non-CV deaths

| Endpoints <sup>a</sup>       | Quintile 1       |      | Quintile 2       |      | Quintile 3 |   | Quintile 4       |      | Quintile 5       |      |
|------------------------------|------------------|------|------------------|------|------------|---|------------------|------|------------------|------|
|                              | HR (95%CI)       | P    | HR (95%CI)       | P    | HR (95%CI) | P | HR (95%CI)       | P    | HR (95%CI)       | P    |
| <i>CV events<sup>b</sup></i> |                  |      |                  |      |            |   |                  |      |                  |      |
| Model 1 <sup>d</sup>         | 2.00 (1.30-3.09) | .002 | 1.47 (0.94-2.31) | .093 | Reference  | - | 1.11 (0.68-1.81) | .670 | 1.64 (1.04-2.56) | .032 |
| Model 2 <sup>e</sup>         | 1.86 (1.21-2.87) | .005 | 1.43 (0.91-2.24) | .120 | Reference  | - | 1.13 (0.70-1.84) | .620 | 1.78 (1.14-2.79) | .012 |
| Model 3 <sup>f</sup>         | 1.89 (1.20-2.97) | .006 | 1.46 (0.93-2.30) | .100 | Reference  | - | 1.16 (0.71-1.89) | .560 | 1.80 (1.14-2.84) | .012 |
| <i>MACEs<sup>c</sup></i>     |                  |      |                  |      |            |   |                  |      |                  |      |
| Model 1                      | 2.14 (1.33-3.47) | .002 | 1.73 (1.06-2.83) | .028 | Reference  | - | 0.99 (0.57-1.74) | .980 | 1.77 (1.08-2.90) | .024 |
| Model 2                      | 1.99 (1.23-3.21) | .005 | 1.68 (1.03-2.74) | .038 | Reference  | - | 1.01 (0.58-1.77) | .970 | 1.93 (1.18-3.18) | .009 |
| Model 3                      | 1.95 (1.17-3.24) | .010 | 1.70 (1.03-2.78) | .037 | Reference  | - | 1.05 (0.60-1.85) | .860 | 2.03 (1.23-3.36) | .006 |
| <i>CV death</i>              |                  |      |                  |      |            |   |                  |      |                  |      |
| Model 1                      | 2.80 (1.37-5.73) | .005 | 2.42 (1.18-4.99) | .016 | Reference  | - | 1.24 (0.54-2.83) | .610 | 2.26 (1.08-4.74) | .030 |
| Model 2                      | 2.47 (1.22-5.02) | .012 | 2.30 (1.12-4.74) | .024 | Reference  | - | 1.28 (0.56-2.91) | .560 | 2.59 (1.23-5.43) | .012 |
| Model 3                      | 2.45 (1.17-5.13) | .018 | 2.38 (1.15-4.93) | .019 | Reference  | - | 1.25 (0.55-2.84) | .600 | 2.43 (1.16-5.09) | .019 |

95%CI, 95% confidence interval; apoB, apolipoprotein B; ACEI, angiotensin-converting enzyme inhibitor; ARB, angiotensin II receptor blocker; BMI, body mass index; CTO, chronic total occlusion; CV, cardiovascular; eGFR, estimated glomerular filtration rate; HDL-C, high-density lipoprotein cholesterol; HR, hazard ratio; hsCRP = high sensitivity C-reactive protein; LDL-C, low-density lipoprotein cholesterol; Lp(a), lipoprotein(a); LVEF, left ventricular ejection fraction; MACE, major adverse cardiac events; MI, myocardial infarction; PAD, peripheral artery disease; TG, triglyceride. <sup>a</sup>HRs with 95% CIs were estimated by Cox proportional hazard models.

He J, et al. *J-shaped association between apolipoprotein B and CV outcomes in statin-treated patients with chronic coronary syndrome. Rev Esp Cardiol. 2024*

<sup>b</sup>CV events were defined as a composite of CV death, nonfatal MI, and nonfatal stroke.

<sup>c</sup>MACEs were defined as a composite of CV death, and nonfatal MI.

<sup>d</sup>Model 1 unadjusted.

<sup>e</sup>Model 2 adjusted for age and male sex.

<sup>f</sup>Model 3 adjusted for Model 2 + BMI, previous MI, previous revascularization, hypertension, diabetes, previous stroke, current smoking, PAD, LVEF, TG, HDL-C, hsCRP, eGFR, Lp(a), 3-vessel disease, CTO lesions, aspirin use, clopidogrel use, and ACEI/ARB use.

**Table 7 of the supplementary data.** Subgroup analysis for the association of apoB quintiles with CV events

|                                   | Quintile 1        | Quintile 2       | Quintile 3 | Quintile 4       | Quintile 5       | P for interaction |
|-----------------------------------|-------------------|------------------|------------|------------------|------------------|-------------------|
|                                   | HR (95%CI)        | HR (95%CI)       | HR (95%CI) | HR (95%CI)       | HR (95%CI)       |                   |
| <i>Age, y<sup>a</sup></i>         |                   |                  |            |                  |                  | .394              |
| <65                               | 0.98 (0.52-1.85)  | 1.04 (0.56-1.91) | Reference  | 0.86 (0.44-1.68) | 1.73 (0.96-3.11) |                   |
| ≥65                               | 3.37 (1.71-6.66)  | 2.23 (1.10-4.52) | Reference  | 1.69 (0.80-3.56) | 1.93 (0.91-4.10) |                   |
| <i>Sex<sup>b</sup></i>            |                   |                  |            |                  |                  | .537              |
| Male                              | 1.76 (1.08-2.86)  | 1.32 (0.80-2.18) | Reference  | 1.05 (0.60-1.83) | 1.74 (1.03-2.94) |                   |
| Female                            | 2.13 (0.70-6.54)  | 2.01 (0.69-5.86) | Reference  | 1.55 (0.52-4.61) | 2.15 (0.76-6.07) |                   |
| <i>Hypertension<sup>c</sup></i>   |                   |                  |            |                  |                  | .744              |
| Absent                            | 1.76 (0.71-4.35)  | 1.22 (0.49-3.03) | Reference  | 0.63 (0.20-1.95) | 1.71 (0.66-4.42) |                   |
| Present                           | 2.00 (1.19-3.35)  | 1.58 (0.93-2.67) | Reference  | 1.38 (0.79-2.39) | 1.92 (1.13-3.27) |                   |
| <i>Diabetes<sup>d</sup></i>       |                   |                  |            |                  |                  | .425              |
| Absent                            | 2.32 (1.23-4.36)  | 1.45 (0.75-2.80) | Reference  | 1.06 (0.51-2.17) | 1.87 (0.96-3.65) |                   |
| Present                           | 1.53 (0.81-2.88)  | 1.42 (0.76-2.65) | Reference  | 1.26 (0.65-2.46) | 1.68 (0.89-3.18) |                   |
| <i>LDL-C levels<sup>e,f</sup></i> |                   |                  |            |                  |                  | .066              |
| ≤2.25 mmol/L                      | 1.98 (1.05-3.73)  | 1.63 (0.87-3.05) | Reference  | 1.94 (0.72-5.18) | -                |                   |
| >2.25 mmol/L                      | 2.41 (0.55-10.52) | 1.23 (0.51-2.97) | Reference  | 0.94 (0.52-1.73) | 1.51 (0.85-2.69) |                   |

95%CI, 95% confidence interval; apoB, apolipoprotein B; ACEI, angiotensin-converting enzyme inhibitor; ARB, angiotensin II receptor blocker; BMI, body mass index; CTO, chronic total occlusion; CV, cardiovascular; eGFR, estimated glomerular filtration rate; HDL-C, high-density lipoprotein cholesterol; HR, hazard ratio;

He J, et al. *J-shaped association between apolipoprotein B and CV outcomes in statin-treated patients with chronic coronary syndrome. Rev Esp Cardiol. 2024*

hsCRP = high sensitivity C-reactive protein; LDL-C, low-density lipoprotein cholesterol; Lp(a), lipoprotein(a); LVEF, left ventricular ejection fraction; MACE, major adverse cardiac events; MI, myocardial infarction; PAD, peripheral artery disease; TG, triglyceride.<sup>a</sup> Models adjusted for male sex, BMI, previous MI, previous revascularization, hypertension, diabetes, previous stroke, current smoking, PAD, LVEF, TG, HDL-C, hsCRP, eGFR, Lp(a), 3-vessel disease, CTO lesions, aspirin use, clopidogrel use, and ACEI/ARB use.

<sup>b</sup>Models adjusted for age, BMI, previous MI, previous revascularization, hypertension, diabetes, previous stroke, current smoking, PAD, LVEF, TG, HDL-C, hsCRP, eGFR, Lp(a), 3-vessel disease, CTO lesions, aspirin use, clopidogrel use, and ACEI/ARB use.

<sup>c</sup>Models adjusted for age, male sex, BMI, previous MI, previous revascularization, diabetes, previous stroke, current smoking, PAD, LVEF, TG, HDL-C, hsCRP, eGFR, Lp(a), 3-vessel disease, CTO lesions, aspirin use, clopidogrel use, and ACEI/ARB use.

<sup>d</sup>Models adjusted for age, male sex, BMI, previous MI, previous revascularization, hypertension, previous stroke, current smoking, PAD, LVEF, TG, HDL-C, hsCRP, eGFR, Lp(a), 3-vessel disease, CTO lesions, aspirin use, clopidogrel use, and ACEI/ARB use.

<sup>e</sup>Models adjusted for age, male sex, BMI, previous MI, previous revascularization, hypertension, diabetes, previous stroke, current smoking, PAD, LVEF, TG, HDL-C, hsCRP, eGFR, Lp(a), 3-vessel disease, CTO lesions, aspirin use, clopidogrel use, and ACEI/ARB use.

<sup>f</sup>We used the median value of LDL-C as the cut-off point.

He J, et al. J-shaped association between apolipoprotein B and CV outcomes in statin-treated patients with chronic coronary syndrome. Rev Esp Cardiol. 2024

**Figure 1 of the supplementary data.** LASSO coefficient path and cross-validation plots for (A&D) CV events, (B&E) MACEs, and (C&F) CV death.

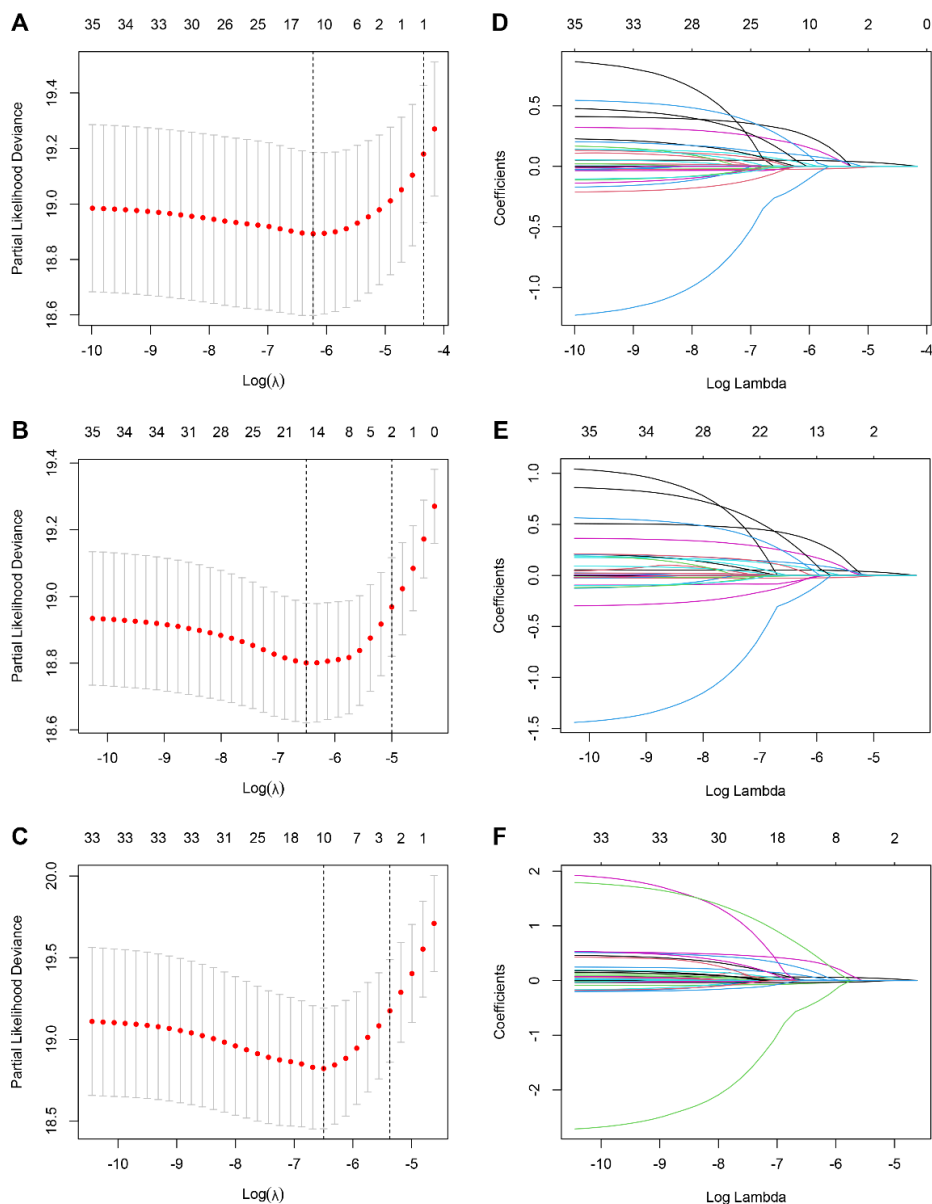

CV, cardiovascular; LASSO, least absolute shrinkage and selection operator; MACE, major adverse cardiac events.

He J, et al. *J-shaped association between apolipoprotein B and CV outcomes in statin-treated patients with chronic coronary syndrome. Rev Esp Cardiol. 2024*

Correcciones a la figura

Cambiar “Log Lambda” a “Log lambda”

Cambiar guiónes a signos menos

Cambiar “Partial Likelihood Devidance” a “Partial likelihood deviance”

He J, et al. J-shaped association between apolipoprotein B and CV outcomes in statin-treated patients with chronic coronary syndrome. *Rev Esp Cardiol.* 2024

**Figure 2 of the supplementary data.** Restricted cubic spline analysis for apoB levels and (A) CV events, (B) MACE, and (C) CV death.

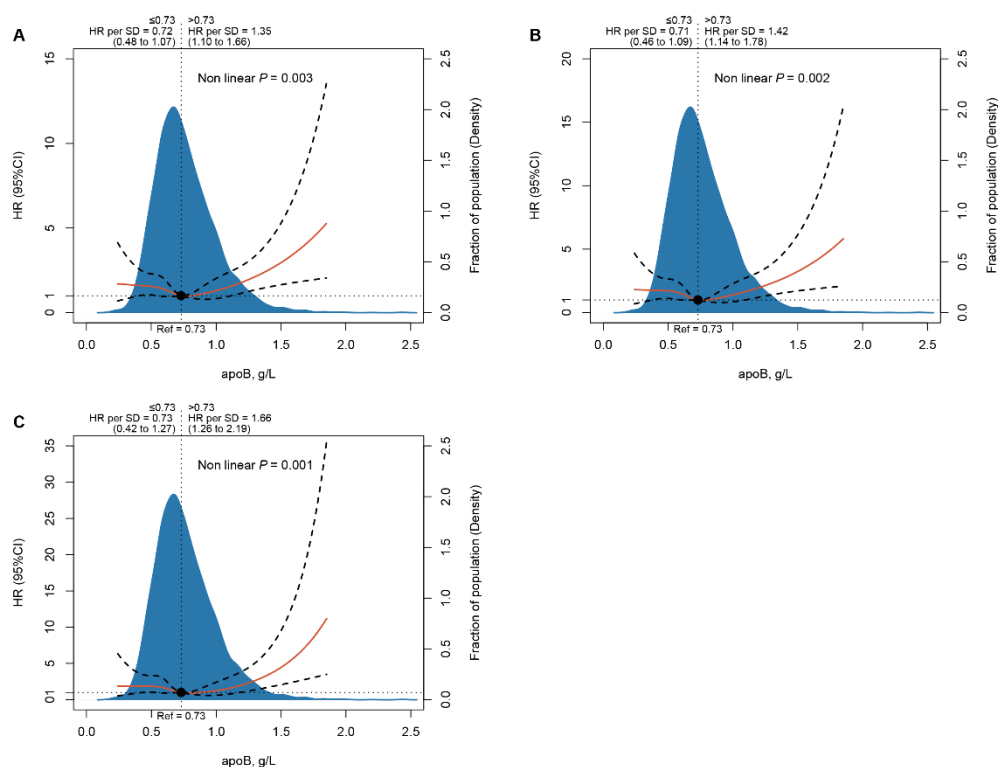

95%CI, 95% confidence interval; apoB, apolipoprotein B; ARB, angiotensin II receptor blocker; BMI, body mass index; CV, cardiovascular; MACE, major adverse cardiac events; MI, myocardial infarction.

CV events included CV death, nonfatal MI, and nonfatal stroke.

MACE included CV death and nonfatal MI.

All restricted cubic spline analyses were adjusted for variables selected from the LASSO regression (see table 3 of the supplementary data).

He J, et al. *J-shaped association between apolipoprotein B and CV outcomes in statin-treated patients with chronic coronary syndrome. Rev Esp Cardiol. 2024*

Correcciones a la figura

Poner espacio a ambos lados de símbolos, p ej <

Indicar valores de p en formato REC

Cambiar "Non linear" a "Nonlinear"
